# Supplementary material for: Mechanistic insights into the thermodynamics and kinetics underlying the reductive decomposition of fluoroethylene and difluoroethylene carbonates for SEI formation in LIBs
Source: Royal Society of Chemistry journal article supplement (doi:10.1039/d5cp01285f), 2025-01-01
Supplement: d5cp01285f1.pdf [file d5cp01285f1.pdf]

## Electronic Supplementary Information

### Mechanistic Insights into the Thermodynamics and Kinetics Underlying the Reductive Decomposition of Fluoroethylene and Difluoroethylene Carbonates for SEI Formation in LIBs

Ruru Song<sup>a,‡</sup>, Tairan Wang<sup>a,d,‡</sup>, Yiyang Pan<sup>a</sup>, Cuili Zhang<sup>e</sup>, Lang Wang<sup>e</sup>, Shengbo Lu<sup>e</sup>, Tracy Chenmin Liu<sup>e</sup>,  
Shihan Qi<sup>f</sup>, Weiguo Huang<sup>f</sup>, Jingjing Liu<sup>g</sup>, Guannan Zhu<sup>f,\*</sup>, Jun Fan<sup>a,b,c,\*</sup>

<sup>a</sup> Department of Materials Science and Engineering, City University of Hong Kong, Hong Kong, China.

<sup>b</sup> Department of Mechanical Engineering, City University of Hong Kong, Hong Kong, China

<sup>c</sup> Center for Advance Nuclear Safety and Sustainable Development, City University of Hong Kong, Hong Kong, China

<sup>d</sup> Yuanlin Tech Co., Ltd., Hong Kong, China

<sup>e</sup> Nano and Advanced Materials Institute Ltd, No.8 Science Park West Avenue, Hong Kong Science Park, HKSAR

<sup>f</sup> Gotion High-tech Power Energy Co., Ltd, Shanghai 201806

<sup>g</sup> GOTION HIGH-TECH (HK) LIMITED, HongKong

\*Corresponding author.

*E-mail address:* zhuguannan@gotion.com.cn; junfan@cityu.edu.hk

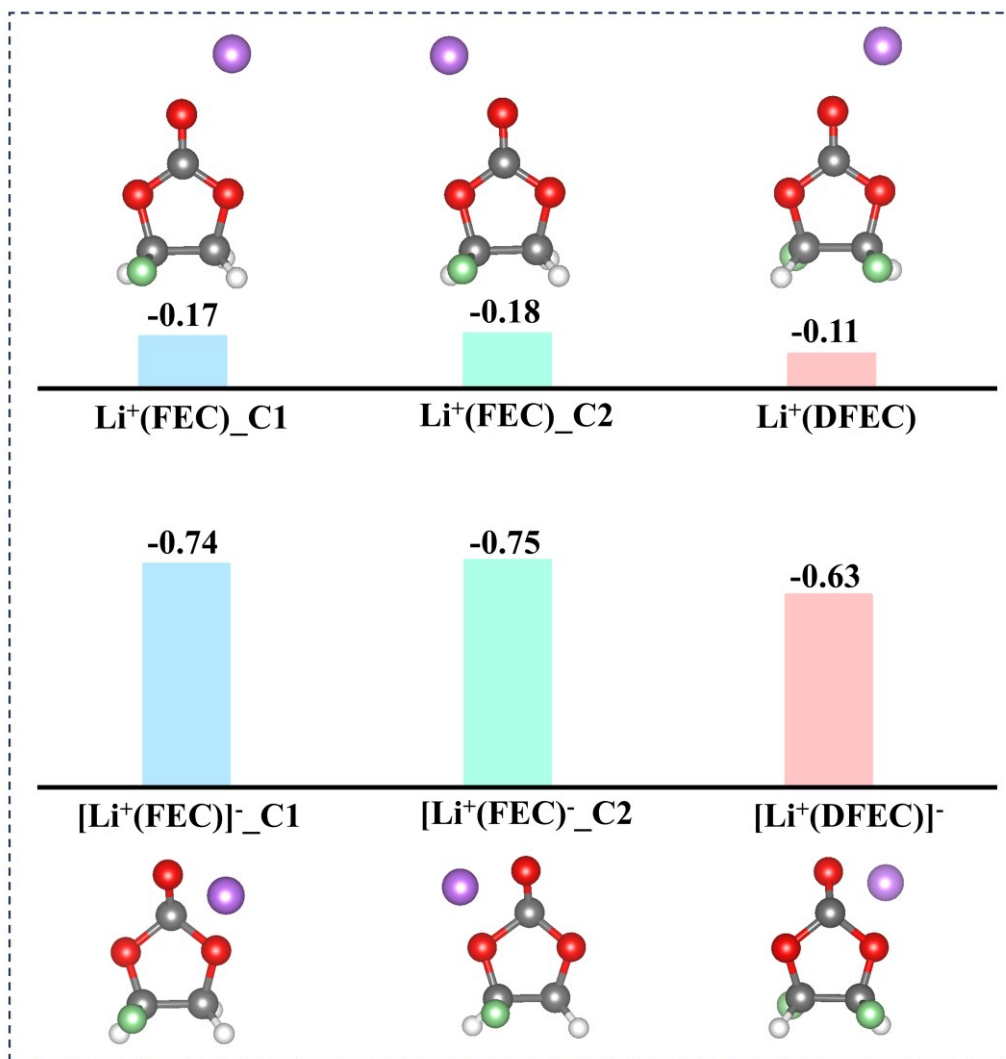

**Fig. S1** Binding energies (in eV) of  $\text{Li}^+(\text{FEC})$  and  $\text{Li}^+(\text{DFEC})$  complexes before and after electron addition.  
 Gray, red, green, white and purple spheres denote C, O, F, H and Li, respectively.

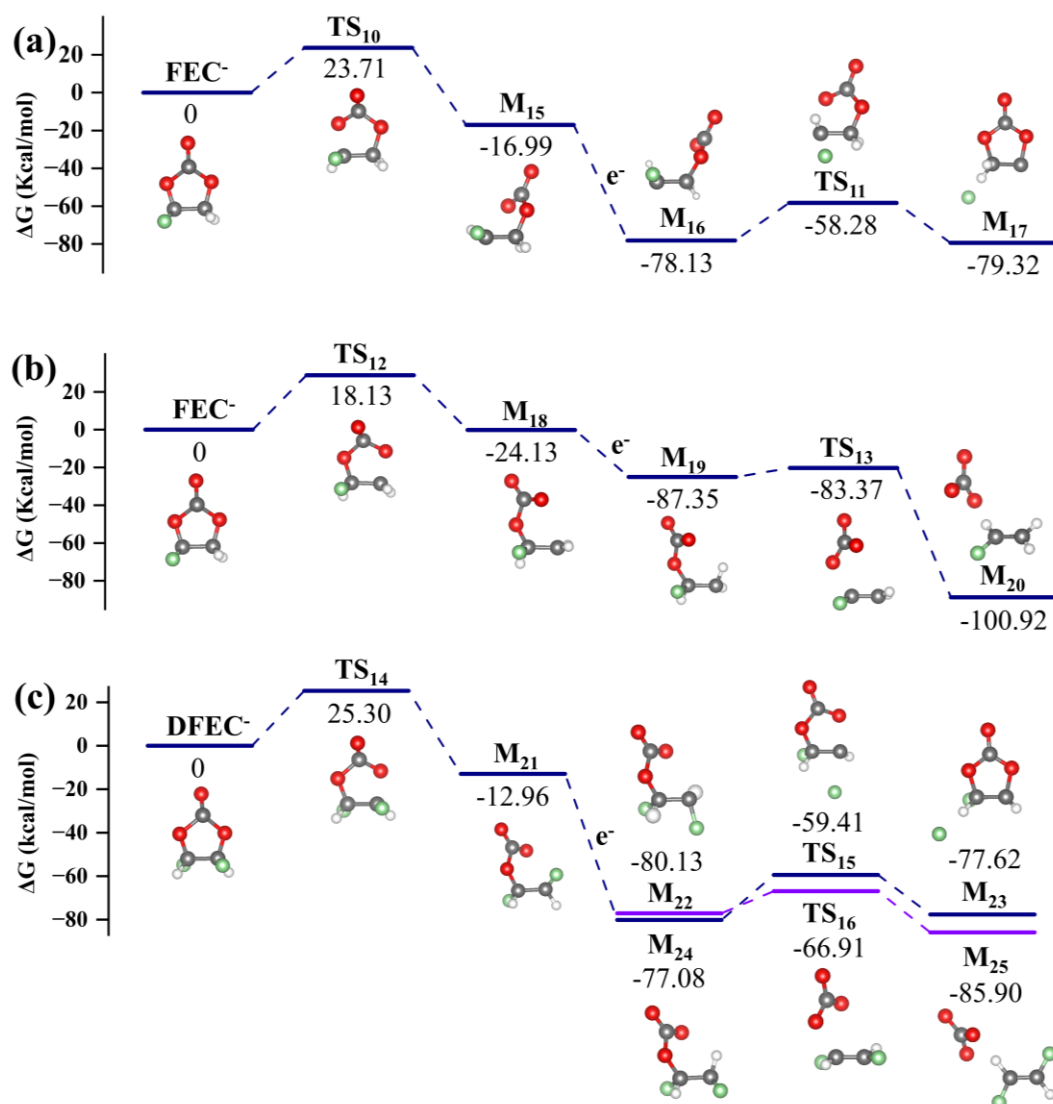

**Fig. S2** Considered the two-electron reduction pathways and decomposition products of (a), (b)  $\text{FEC}^-$  and (c)  $\text{DFEC}^-$ . Gray, red, green, white and purple spheres denote C, O, F, H and Li, respectively.

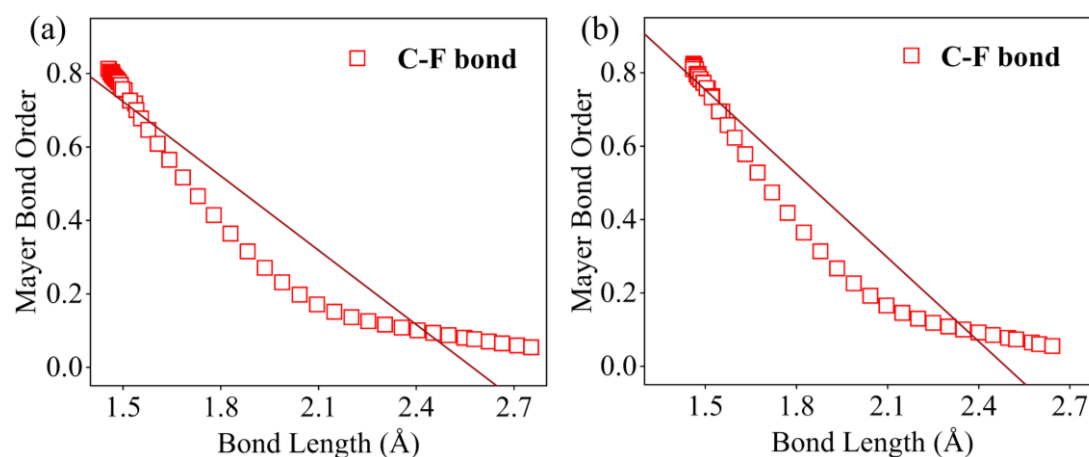

**Fig. S3** Correlation between Mayer bond order (MBO) and C-F bond lengths. (a) From  $M_4$  to  $M_5$  in the  $[\text{Li}^+(\text{FEC})]^-$  C2 reduction pathways along the IRC, and (b)  $M_{13}$  to  $M_{14}$  in  $[\text{Li}^+(\text{DFEC})]^-$  reduction pathways along the IRC.

**Table S1** Analysis of the number and values of imaginary frequencies (IF, in  $\text{cm}^{-1}$ ) for all transition states (TSs).

| Structure        | IF     |                            |
|------------------|--------|----------------------------|
|                  | Number | Value ( $\text{cm}^{-1}$ ) |
| TS <sub>1</sub>  | 1      | -1192.81                   |
| TS <sub>2</sub>  | 1      | -335.03                    |
| TS <sub>3</sub>  | 1      | -198.96                    |
| TS <sub>4</sub>  | 1      | -141.33                    |
| TS <sub>5</sub>  | 1      | -1252.90                   |
| TS <sub>6</sub>  | 1      | -413.75                    |
| TS <sub>7</sub>  | 1      | -228.24                    |
| TS <sub>8</sub>  | 1      | -115.39                    |
| TS <sub>9</sub>  | 1      | -165.56                    |
| TS <sub>10</sub> | 1      | -1218.99                   |
| TS <sub>11</sub> | 1      | -427.53                    |
| TS <sub>12</sub> | 1      | -1218.99                   |
| TS <sub>13</sub> | 1      | -254.84                    |
| TS <sub>14</sub> | 1      | -1275.63                   |
| TS <sub>15</sub> | 1      | -477.60                    |
| TS <sub>16</sub> | 1      | -276.20                    |

**Table S2** Comparison of key parameters in the  $[\text{Li}^+(\text{DFEC})]^-$  and  $[\text{Li}^+(\text{DFEC})]^-$  reaction pathways.

| Comparison Parameter                    | $[\text{Li}^+(\text{DFEC})]^-$            | $[\text{Li}^+(\text{DFEC})]^-$               |                                                                                                                   |
|-----------------------------------------|-------------------------------------------|----------------------------------------------|-------------------------------------------------------------------------------------------------------------------|
|                                         |                                           | single-defluorination                        | double-defluorination                                                                                             |
| LiF formation quantity (mol)            | LiF                                       | LiF                                          | 2LiF                                                                                                              |
| $\Delta G^\ddagger$ value (in kcal/mol) | 1.82                                      | 3.35                                         | 10.49                                                                                                             |
| $\Delta G^\ddagger$ difference ratios   | 1<br>(vs $[\text{Li}^+(\text{DFEC})]^-$ ) | 1.84<br>(vs $[\text{Li}^+(\text{DFEC})]^-$ ) | 5.76<br>(vs $[\text{Li}^+(\text{DFEC})]^-$ )<br>3.13<br>(vs $[\text{Li}^+(\text{DFEC})]^-$ single-defluorination) |
